# Supplementary material
Source: PubMed Central journal article supplement (PMC5404734)
Supplement: NIHMS855361-supplement-Supp.pdf [file NIHMS855361-supplement-Supp.pdf]

## Supplementary Online Content

Valikodath NG, Newman-Casey PA, Lee PP, Musch DC, Niziol LM, Woodward MA. Agreement of ocular symptom reporting between patient-reported outcomes and medical records. *JAMA Ophthalmol*. Published online January 26, 2017. doi:10.1001/jamaophthalmol.2016.5551

**eFigure.** Eye Symptom Questionnaire Performed by Patient Self-Report

**eTable 1.** Other Eye Symptoms Recorded in the Medical Record

**eTable 2.** Eye-Based Distribution of Symptoms in ESQ vs MR (n=324)

**eTable 3.** Subject-Based Distribution of Symptoms in ESQ vs MR (n=162)

**eTable 4.** Univariate Logistic Regression Models for the Probability of Not Reporting (Absent or Not Documented) a Symptom in the Medical Record (MR) That Was Reported on the Eye Symptom Questionnaire (ESQ)

This supplementary material has been provided by the authors to give readers additional information about their work.

**eFigure. Eye Symptom Questionnaire Performed by Patient Self-Report**

Eye Symptom Questionnaire containing eight eye symptom items, including eye pain, burning, itchy, gritty sensation, eye redness, glare, sensitivity to light, and blurry vision. Symptoms were asked separately for the right and left eyes.

RIGHT EYE Study #: \_\_\_\_\_  
LEFT EYE Study #: \_\_\_\_\_

**GENERAL HEALTH AND VISION**

- 1. In general, would you say your overall health is:
  - Excellent
  - Very Good
  - Good
  - Fair
  - Poor
  
- 2. At the present time, would you say your eyesight using both eyes (with glasses or contact lenses, if you wear them) is:
  - Excellent
  - Good
  - Fair
  - Poor
  - Very poor
  - Completely blind
  
- 3. How much of the time do you worry about your eyesight?
  - None of the time
  - A little of the time
  - Some of the time
  - Most of the time
  - All of the time

**EYE PROBLEMS**

Please answer the following questions for the **RIGHT EYE and LEFT EYE**. Answer the questions thinking of your vision as it is when corrected by any glasses or contact lenses that you usually use.

1. **In the last 7 days**, how much pain or discomfort have you had in & around your eye (ex: burning, itching, or aching)?

- |                                                                                                                                                                             |                                                                                                                                                                                                                           |
|-----------------------------------------------------------------------------------------------------------------------------------------------------------------------------|---------------------------------------------------------------------------------------------------------------------------------------------------------------------------------------------------------------------------|
| <p><b>LEFT EYE</b></p> <ul style="list-style-type: none"><li><input type="radio"/> None</li><li><input type="radio"/> Mild</li><li><input type="radio"/> Moderate</li></ul> | <ul style="list-style-type: none"><li><input type="radio"/> Severe</li><li><input type="radio"/> Very severe</li></ul> <p><b>RIGHT EYE</b></p> <ul style="list-style-type: none"><li><input type="radio"/> None</li></ul> |
|-----------------------------------------------------------------------------------------------------------------------------------------------------------------------------|---------------------------------------------------------------------------------------------------------------------------------------------------------------------------------------------------------------------------|



**LEFT EYE**

- No problem at all
- A little bit of a problem
- Somewhat of a problem
- Very much of a problem

**RIGHT EYE**

- No problem at all
- A little bit of a problem
- Somewhat of a problem
- Very much of a problem

9. In the last 7 days, how much of a problem did you have with headaches because of your vision, or because of your glasses or contact lenses?

- No problem at all
- A little bit of a problem
- Somewhat of a problem
- Very much of a problem

**OTHER EYE HISTORY**

1. In general, do you use contact lenses?

- Yes
- No

2. If you have eye symptoms, how long have your symptoms been occurring? Please specify duration (Ex: 2 days, 2 weeks, 2 months, etc.) and **fill in the blank space below**.

---



---



---

3. Please list any eye symptoms you currently have that were not asked on this questionnaire by **filling in the blank space below**:

---



---



---

THANK YOU FOR YOUR TIME!

**eTable 1. Other Eye Symptoms Recorded in the Medical Record**

| Category       | Patient Descriptors                                                 |
|----------------|---------------------------------------------------------------------|
| Dryness        | Dryness, dry eye                                                    |
| Tearing        | Tearing, watering                                                   |
| Irritation     | Irritation                                                          |
| Mucus          | Mucus, crusting, sticky, drainage, discharge, eyes glued shut       |
| Pulling        | Pulling sensation                                                   |
| Swelling       | Swelling, eyelid swelling                                           |
| Numbness       | Numbness/tingling                                                   |
| Pressure       | Pressure                                                            |
| Eye Strain     | Eye strain                                                          |
| Amaurosis      | Amaurosis, periods with 'some parts missing' in vision              |
| Flashes        | Flashes of light                                                    |
| Floater(s)     | Spot in vision, floater, black dots, dark gray shape, squiggly line |
| Eye movement   | Rapid eye movements                                                 |
| Double vision  | Double vision, eye drift                                            |
| Depth problems | Problems with depth perception                                      |
| Dizziness      | Dizzy, lightheaded                                                  |

**eTable 2. Eye-Based Distribution of Symptoms in ESQ vs MR (n=324)**

| ESQ Symptom Report               | MR Symptom Documentation |                                  |            |                  | Row Totals |  |
|----------------------------------|--------------------------|----------------------------------|------------|------------------|------------|--|
|                                  | Present                  | Reported<br>no eye<br>laterality | Absent     | Not<br>Mentioned |            |  |
|                                  | freq (%)                 | freq (%)                         | freq (%)   | freq (%)         | freq (%)   |  |
| <b>Blurry Vision<sup>a</sup></b> |                          |                                  |            |                  |            |  |
| Very much a problem              | 28 (8.7)                 | 24 (7.5)                         | 6 (1.9)    | 16 (5.0)         | 74 (23.1)  |  |
| Somewhat a problem               | 13 (4.1)                 | 12 (3.7)                         | 2 (0.6)    | 14 (4.4)         | 41 (12.8)  |  |
| A little bit of a problem        | 17 (5.3)                 | 12 (3.7)                         | 6 (1.9)    | 31 (9.7)         | 66 (20.6)  |  |
| No problem at all                | 6 (1.9)                  | 25 (7.8)                         | 38 (11.8)  | 71 (22.1)        | 140 (43.6) |  |
| Column Totals                    | 64 (19.9)                | 73 (22.7)                        | 52 (16.2)  | 132 (41.1)       |            |  |
| <b>Glare</b>                     |                          |                                  |            |                  |            |  |
| Very much a problem              | 0 (0.0)                  | 3 (0.9)                          | 0 (0.0)    | 55 (17.0)        | 58 (17.9)  |  |
| Somewhat a problem               | 1 (0.3)                  | 5 (1.5)                          | 0 (0.0)    | 53 (16.4)        | 59 (18.2)  |  |
| A little bit of a problem        | 0 (0.0)                  | 2 (0.6)                          | 0 (0.0)    | 55 (17.0)        | 57 (17.6)  |  |
| No problem at all                | 4 (1.2)                  | 8 (2.5)                          | 3 (0.9)    | 135 (41.7)       | 150 (46.3) |  |
| Column Totals                    | 5 (1.5)                  | 18 (5.6)                         | 3 (0.9)    | 298 (92.0)       |            |  |
| <b>Eye Pain</b>                  |                          |                                  |            |                  |            |  |
| Very severe                      | 8 (2.5)                  | 0 (0.0)                          | 0 (0.0)    | 3 (0.9)          | 11 (3.4)   |  |
| Severe                           | 11 (3.4)                 | 1 (0.3)                          | 6 (1.9)    | 6 (1.9)          | 24 (7.4)   |  |
| Moderate                         | 12 (3.7)                 | 4 (1.2)                          | 8 (2.5)    | 22 (6.8)         | 46 (14.2)  |  |
| Mild                             | 8 (2.5)                  | 0 (0.0)                          | 31 (9.6)   | 22 (6.8)         | 61 (18.8)  |  |
| None                             | 3 (0.9)                  | 5 (1.5)                          | 133 (41.0) | 41 (12.7)        | 182 (56.2) |  |
| Column Totals                    | 42 (13.0)                | 10 (3.1)                         | 178 (54.9) | 94 (29.0)        |            |  |
| <b>Eye Redness</b>               |                          |                                  |            |                  |            |  |
| Very much a problem              | 11 (3.4)                 | 2 (0.6)                          | 2 (0.6)    | 19 (5.9)         | 34 (10.5)  |  |
| Somewhat a problem               | 9 (2.8)                  | 1 (0.3)                          | 2 (0.6)    | 16 (4.9)         | 28 (8.6)   |  |
| A little bit of a problem        | 4 (1.2)                  | 1 (0.3)                          | 10 (3.1)   | 38 (11.7)        | 53 (16.4)  |  |
| No problem at all                | 5 (1.5)                  | 6 (1.9)                          | 55 (17.0)  | 143 (44.1)       | 209 (64.5) |  |
| Column Totals                    | 29 (9.0)                 | 10 (3.1)                         | 69 (21.3)  | 216 (66.7)       |            |  |
| <b>Burning<sup>a</sup></b>       |                          |                                  |            |                  |            |  |

|                                                                                                                                      |          |          |          |               |               |  |
|--------------------------------------------------------------------------------------------------------------------------------------|----------|----------|----------|---------------|---------------|--|
| Very much a problem                                                                                                                  | 3 (0.9)  | 1 (0.3)  | 0 (0.0)  | 20 (6.2)      | 24 (7.5)      |  |
| Somewhat a problem                                                                                                                   | 2 (0.6)  | 0 (0.0)  | 0 (0.0)  | 25 (7.8)      | 27 (8.4)      |  |
| A little bit of a problem                                                                                                            | 3 (0.9)  | 3 (0.9)  | 0 (0.0)  | 43 (13.4)     | 48 (15.0)     |  |
| No problem at all                                                                                                                    | 2 (0.6)  | 2 (0.6)  | 10 (3.1) | 208<br>(64.6) | 222<br>(69.2) |  |
| Column Totals                                                                                                                        | 10 (3.1) | 6 (1.9)  | 10 (3.1) | 296<br>(91.9) |               |  |
| Itching                                                                                                                              |          |          |          |               |               |  |
| Very much a problem                                                                                                                  | 6 (1.9)  | 1 (0.3)  | 0 (0.0)  | 13 (4.0)      | 20 (6.2)      |  |
| Somewhat a problem                                                                                                                   | 0 (0.0)  | 1 (0.3)  | 1 (0.3)  | 20 (6.9)      | 22 (6.8)      |  |
| A little bit of a problem                                                                                                            | 4 (1.2)  | 3 (0.9)  | 1 (0.3)  | 86 (26.5)     | 94 (29.0)     |  |
| No problem at all                                                                                                                    | 0 (0.0)  | 5 (1.5)  | 10 (3.1) | 173<br>(53.4) | 188<br>(58.0) |  |
| Column Totals                                                                                                                        | 10 (3.1) | 10 (3.1) | 12 (3.7) | 292<br>(90.1) |               |  |
| Gritty                                                                                                                               |          |          |          |               |               |  |
| Very much a problem                                                                                                                  | 7 (2.2)  | 0 (0.0)  | 1 (0.3)  | 18 (5.6)      | 26 (8.0)      |  |
| Somewhat a problem                                                                                                                   | 6 (1.9)  | 0 (0.0)  | 1 (0.3)  | 18 (5.6)      | 25 (7.7)      |  |
| A little bit of a problem                                                                                                            | 9 (2.8)  | 2 (0.6)  | 1 (0.3)  | 39 (12.0)     | 51 (15.7)     |  |
| No problem at all                                                                                                                    | 2 (0.6)  | 4 (1.2)  | 25 (7.7) | 191<br>(59.0) | 222<br>(68.5) |  |
| Column Totals                                                                                                                        | 24 (7.4) | 6 (1.9)  | 28 (8.6) | 266<br>(82.1) |               |  |
| Sensitive to Light                                                                                                                   |          |          |          |               |               |  |
| Very much a problem                                                                                                                  | 4 (1.2)  | 9 (2.8)  | 4 (1.2)  | 40 (12.4)     | 57 (17.6)     |  |
| Somewhat a problem                                                                                                                   | 5 (1.5)  | 2 (0.6)  | 1 (0.3)  | 42 (13.0)     | 50 (15.4)     |  |
| A little bit of a problem                                                                                                            | 1 (0.3)  | 3 (0.9)  | 7 (2.2)  | 50 (15.4)     | 61 (18.8)     |  |
| No problem at all                                                                                                                    | 5 (1.5)  | 6 (1.9)  | 17 (5.2) | 128<br>(39.5) | 156<br>(48.1) |  |
| Column Totals                                                                                                                        | 15 (4.6) | 20 (6.2) | 29 (9.0) | 260<br>(80.2) |               |  |
|                                                                                                                                      |          |          |          |               |               |  |
| <sup>a</sup> Missing data was present for these symptoms, percentages based on: n=321 eyes for Blurry vision; n=322 eyes for Burning |          |          |          |               |               |  |

**eTable 3. Subject-Based Distribution of Symptoms in ESQ vs MR (n=162)**

| ESQ Symptom Report               | MR Symptom Documentation |           |               | Row Totals |
|----------------------------------|--------------------------|-----------|---------------|------------|
|                                  | Present                  | Absent    | Not Mentioned |            |
|                                  | freq (%)                 | freq (%)  | freq (%)      | freq (%)   |
| <b>Blurry Vision<sup>a</sup></b> |                          |           |               |            |
| Very much a problem              | 39 (24.4)                | 1 (0.6)   | 13 (8.1)      | 53 (33.1)  |
| Somewhat a problem               | 21 (13.1)                | 0 (0.0)   | 11 (6.9)      | 32 (20.0)  |
| A little bit of a problem        | 19 (11.9)                | 2 (1.3)   | 19 (11.9)     | 40 (25.0)  |
| No problem at all                | 10 (6.3)                 | 2 (1.3)   | 23 (14.4)     | 35 (21.9)  |
| Column Totals                    | 89 (55.6)                | 5 (3.1)   | 66 (41.3)     |            |
| <b>Glare</b>                     |                          |           |               |            |
| Very much a problem              | 2 (1.2)                  | 0 (0.0)   | 40 (24.7)     | 42 (25.9)  |
| Somewhat a problem               | 3 (1.9)                  | 0 (0.0)   | 31 (19.1)     | 34 (21.0)  |
| A little bit of a problem        | 1 (0.6)                  | 0 (0.0)   | 33 (20.4)     | 34 (21.0)  |
| No problem at all                | 6 (3.7)                  | 1 (0.6)   | 45 (27.8)     | 52 (32.1)  |
| Column Totals                    | 12 (7.4)                 | 1 (0.6)   | 149 (92.0)    |            |
| <b>Eye Pain</b>                  |                          |           |               |            |
| Very severe                      | 8 (4.9)                  | 0 (0.0)   | 3 (1.9)       | 11 (6.8)   |
| Severe                           | 12 (7.4)                 | 5 (3.1)   | 5 (3.1)       | 22 (13.6)  |
| Moderate                         | 14 (8.6)                 | 4 (2.5)   | 15 (9.3)      | 33 (20.4)  |
| Mild                             | 7 (4.3)                  | 20 (12.4) | 12 (7.4)      | 39 (24.1)  |
| None                             | 4 (2.5)                  | 41 (25.3) | 12 (7.4)      | 57 (35.2)  |
| Column Totals                    | 45 (27.8)                | 70 (43.2) | 47 (29.0)     |            |
| <b>Eye Redness</b>               |                          |           |               |            |
| Very much a problem              | 13 (8.0)                 | 1 (0.6)   | 17 (10.5)     | 31 (19.1)  |
| Somewhat a problem               | 10 (6.2)                 | 2 (1.2)   | 12 (7.4)      | 24 (14.8)  |
| A little bit of a problem        | 3 (1.9)                  | 5 (3.1)   | 20 (12.4)     | 28 (17.3)  |
| No problem at all                | 5 (3.1)                  | 15 (9.3)  | 59 (36.4)     | 79 (48.8)  |
| Column Totals                    | 31 (19.1)                | 23 (14.2) | 108 (66.7)    |            |
| <b>Burning<sup>a</sup></b>       |                          |           |               |            |
| Very much a problem              | 4 (2.5)                  | 0 (0.0)   | 18 (11.2)     | 22 (13.7)  |
| Somewhat a problem               | 2 (1.2)                  | 0 (0.0)   | 19 (11.8)     | 21 (13.0)  |
| A little bit of a problem        | 3 (1.9)                  | 0 (0.0)   | 30 (18.6)     | 33 (20.5)  |
| No problem at all                | 2 (1.2)                  | 2 (1.2)   | 81 (50.3)     | 85 (52.8)  |
| Column Totals                    | 11 (6.8)                 | 2 (1.2)   | 148 (91.9)    |            |
| <b>Itching</b>                   |                          |           |               |            |
| Very much a problem              | 5 (3.1)                  | 0 (0.0)   | 9 (5.6)       | 14 (8.6)   |

|                                                                                                                                                          |           |          |            |           |
|----------------------------------------------------------------------------------------------------------------------------------------------------------|-----------|----------|------------|-----------|
| Somewhat a problem                                                                                                                                       | 1 (0.6)   | 1 (0.6)  | 16 (9.9)   | 18 (11.1) |
| A little bit of a problem                                                                                                                                | 5 (3.1)   | 0 (0.0)  | 52 (32.1)  | 57 (35.2) |
| No problem at all                                                                                                                                        | 1 (0.6)   | 3 (1.9)  | 69 (42.6)  | 73 (45.1) |
| Column Totals                                                                                                                                            | 12 (7.4)  | 4 (2.5)  | 146 (90.1) |           |
| Gritty                                                                                                                                                   |           |          |            |           |
| Very much a problem                                                                                                                                      | 7 (4.3)   | 1 (0.6)  | 12 (7.4)   | 20 (12.3) |
| Somewhat a problem                                                                                                                                       | 6 (3.7)   | 0 (0.0)  | 14 (8.6)   | 20 (12.3) |
| A little bit of a problem                                                                                                                                | 8 (4.9)   | 0 (0.0)  | 28 (17.3)  | 36 (22.2) |
| No problem at all                                                                                                                                        | 4 (2.5)   | 3 (1.9)  | 79 (48.8)  | 86 (53.1) |
| Column Totals                                                                                                                                            | 25 (15.4) | 4 (2.5)  | 133 (82.1) |           |
| Sensitive to Light                                                                                                                                       |           |          |            |           |
| Very much a problem                                                                                                                                      | 11 (6.8)  | 2 (1.2)  | 29 (17.9)  | 42 (25.9) |
| Somewhat a problem                                                                                                                                       | 5 (3.1)   | 0 (0.0)  | 25 (19.2)  | 30 (18.5) |
| A little bit of a problem                                                                                                                                | 2 (1.2)   | 5 (3.1)  | 26 (16.1)  | 33 (20.4) |
| No problem at all                                                                                                                                        | 4 (2.5)   | 3 (1.9)  | 50 (30.9)  | 57 (35.2) |
| Column Totals                                                                                                                                            | 22 (13.6) | 10 (6.2) | 130 (80.2) |           |
| aMissing data was present for these symptoms, percentages based on: n=160 subjects for Blurry vision and Burning                                         |           |          |            |           |
| Note: Symptom report was aggregated to the person-level (the worst level of symptom report between eyes was designated the subject-based symptom report) |           |          |            |           |

**eTable 4. Univariate Logistic Regression Models for the Probability of Not Reporting (Absent or Not Documented) a Symptom in the Medical Record (MR) That Was Reported on the Eye Symptom Questionnaire (ESQ)**

| Blurry Visionc                        |      |                |         |              |
|---------------------------------------|------|----------------|---------|--------------|
| Variable                              | OR   | 95% CI         | P-value | Adj. P-value |
| Age (per 10 years)                    | 1.13 | (0.87, 1.46)   | 0.362   | 1.000        |
| Male (vs. Female)                     | 1.00 | (0.39, 2.59)   | 1.000   | 1.000        |
| Patient Diagnosisa                    |      |                |         |              |
| Non-Urgent AS (vs. Normal)b           | 2.64 | (0.08, 88.75)  | 0.588   | 1.000        |
| Urgent AS (vs. Normal)b               | 3.45 | (0.11, 110.79) | 0.484   | 1.000        |
| Urgent AS (vs. Non-Urgent)            | 1.34 | (0.49, 3.61)   | 0.569   | 1.000        |
| Years in practice (per 5 years)       | 1.00 | (0.84, 1.20)   | 0.981   | 1.000        |
| Daily Clinic Volume (per 10 patients) | 0.92 | (0.71, 1.18)   | 0.509   | 1.000        |
| Scribe Present (vs. Absent)           | 0.93 | (0.36, 2.42)   | 0.886   | 1.000        |
| Visit Type                            |      |                |         |              |
| Return Visit (vs. New Visit)          | 5.25 | (1.69, 16.30)  | 0.004   | 0.045        |
| New Problem (vs. Return Visit)        | 0.97 | (0.19, 4.93)   | 0.971   | 1.000        |
| New Problem (vs. New Visit)           | 5.10 | (0.87, 29.85)  | 0.071   | 0.707        |

| Eye Paind                             |      |               |         |              |
|---------------------------------------|------|---------------|---------|--------------|
| Variable                              | OR   | 95% CI        | P-value | Adj. P-value |
| Age (per 10 years)                    | 0.99 | (0.77, 1.27)  | 0.913   | 1.000        |
| Male (vs. Female)                     | 0.58 | (0.21, 1.58)  | 0.283   | 1.000        |
| Patient Diagnosisa                    |      |               |         |              |
| Non-Urgent AS (vs. Normal)b           | 2.10 | (0.11, 40.46) | 0.626   | 1.000        |
| Urgent AS (vs. Normal)b               | 0.72 | (0.04, 12.19) | 0.819   | 1.000        |
| Urgent AS (vs. Non-Urgent)            | 0.32 | (0.10, 1.08)  | 0.067   | 0.601        |
| Years in practice (per 5 years)       | 0.82 | (0.63, 1.08)  | 0.159   | 1.000        |
| Daily Clinic Volume (per 10 patients) | 0.87 | (0.69, 1.09)  | 0.228   | 1.000        |
| Scribe Present (vs. Absent)           | 0.42 | (0.16, 1.14)  | 0.090   | 0.720        |
| Visit Type                            |      |               |         |              |
| Return Visit (vs. New Visit)          | 4.95 | (1.62, 15.16) | 0.005   | 0.056        |
| New Problem (vs. Return Visit)        | 1.67 | (0.28, 9.86)  | 0.573   | 1.000        |
| New Problem (vs. New Visit)           | 8.25 | (1.37, 49.57) | 0.021   | 0.211        |

| Eye Rednesse                          |      |               |         |              |
|---------------------------------------|------|---------------|---------|--------------|
| Variable                              | OR   | 95% CI        | P-value | Adj. P-value |
| Age (per 10 years)                    | 1.16 | (0.87, 1.55)  | 0.326   | 1.000        |
| Male (vs. Female)                     | 2.02 | (0.65, 6.23)  | 0.223   | 1.000        |
| Patient Diagnosisa                    |      |               |         |              |
| Non-Urgent AS (vs. Normal)b           | 0.48 | (0.00, 52.87) | 0.760   | 1.000        |
| Urgent AS (vs. Normal)b               | 0.44 | (0.01, 41.90) | 0.721   | 1.000        |
| Urgent AS (vs. Non-Urgent)            | 0.88 | (0.22, 3.55)  | 0.854   | 1.000        |
| Years in practice (per 5 years)       | 1.03 | (0.73, 1.46)  | 0.852   | 1.000        |
| Daily Clinic Volume (per 10 patients) | 0.83 | (0.65, 1.07)  | 0.144   | 1.000        |

|                                                                                                                                                                                                                                                                                                                                                                                                                                                                                                                                                                                                                                                                                                                                                                                                                                                                       |      |               |       |       |
|-----------------------------------------------------------------------------------------------------------------------------------------------------------------------------------------------------------------------------------------------------------------------------------------------------------------------------------------------------------------------------------------------------------------------------------------------------------------------------------------------------------------------------------------------------------------------------------------------------------------------------------------------------------------------------------------------------------------------------------------------------------------------------------------------------------------------------------------------------------------------|------|---------------|-------|-------|
| Scribe Present (vs. Absent)                                                                                                                                                                                                                                                                                                                                                                                                                                                                                                                                                                                                                                                                                                                                                                                                                                           | 0.64 | (0.22, 1.91)  | 0.426 | 1.000 |
| Visit Type                                                                                                                                                                                                                                                                                                                                                                                                                                                                                                                                                                                                                                                                                                                                                                                                                                                            |      |               |       |       |
| Return Visit (vs. New Visit)                                                                                                                                                                                                                                                                                                                                                                                                                                                                                                                                                                                                                                                                                                                                                                                                                                          | 3.68 | (1.04, 13.10) | 0.044 | 0.484 |
| New Problem (vs. Return Visit)                                                                                                                                                                                                                                                                                                                                                                                                                                                                                                                                                                                                                                                                                                                                                                                                                                        | 0.18 | (0.03, 1.01)  | 0.051 | 0.513 |
| New Problem (vs. New Visit)                                                                                                                                                                                                                                                                                                                                                                                                                                                                                                                                                                                                                                                                                                                                                                                                                                           | 0.65 | (0.13, 3.23)  | 0.605 | 1.000 |
| <p>OR = Odds Ratio; CI = Confidence Interval; Adj = Adjusted; AS = Anterior Segment; pts = patients</p> <p>a Patient diagnosis was defined as the worse of the two eyes</p> <p>b Firth adjustment used due to small sample of normal diagnosis</p> <p>c Model based on the sample of 85 subjects that reported blurry vision on the ESQ in at least 1 eye, of which 25 had a negative report or no documentation in the MR</p> <p>d Model based on the sample of 66 subjects that reported eye pain on the ESQ in at least 1 eye, of which 32 had a negative report or no documentation in the MR</p> <p>e Model based on the sample of 55 subjects that reported eye redness on the ESQ in at least 1 eye, of which 32 had a negative report or no documentation in the MR</p> <p>Note: adjusted p-values are adjusted for multiple comparisons by Holm's method</p> |      |               |       |       |
